# Supplementary material
Source: publisher figshare collection journal article supplement (https://acs.figshare.com/ndownloader/files/5183371)
Supplement: Supplementary file 1 [file 5183371]

**Domino Michael-Aldol Reactions on 1,4-Diarylbut-2-ene-1,4-diones  
with Methyl Acetoacetate furnish Methyl 2-Aroyl-4-hydroxy-6-oxo-4-  
arylcyclohexane-1-carboxylate Derivatives**

H. Surya Prakash Rao<sup>\*</sup> and S. P. Senthilkumar

**Table of Contents for Supporting Information**

|                                                                                                                                                                                |     |
|--------------------------------------------------------------------------------------------------------------------------------------------------------------------------------|-----|
| 1. Experimental Section, General.                                                                                                                                              | S3  |
| 2. <sup>1</sup> H NMR spectrum of methyl (1 <i>R</i> *,2 <i>S</i> *,4 <i>S</i> *)-2-benzoyl-4-hydroxy-6-oxo-4-phenylcyclohexane-1-carboxylate ( <b>5</b> )                     | S4  |
| 3. <sup>13</sup> C NMR spectrum of methyl (1 <i>R</i> *,2 <i>S</i> *,4 <i>S</i> *)-2-benzoyl-4-hydroxy-6-oxo-4-phenylcyclohexane-1-carboxylate ( <b>5</b> )                    | S5  |
| 4. <sup>1</sup> H- <sup>1</sup> H COSY spectrum of methyl (1 <i>R</i> *,2 <i>S</i> *,4 <i>S</i> *)-2-benzoyl-4-hydroxy-6-oxo-4-phenylcyclohexane-1-carboxylate ( <b>5</b> )    | S6  |
| 5. NOESY spectrum of methyl (1 <i>R</i> *,2 <i>S</i> *,4 <i>S</i> *)-2-benzoyl-4-hydroxy-6-oxo-4-phenylcyclohexane-1-carboxylate ( <b>5</b> )                                  | S7  |
| 6. <sup>1</sup> H NMR spectrum of methyl 2-(4-chloro-3-methylbenzoyl)-4-(4-chloro-3-methylphenyl)-4-hydroxy-6-oxocyclohexane-1-carboxylate ( <b>12</b> )                       | S8  |
| 7. <sup>13</sup> C NMR spectrum of methyl 2-(4-chloro-3-methylbenzoyl)-4-(4-chloro-3-methylphenyl)-4-hydroxy-6-oxocyclohexane-1-carboxylate ( <b>12</b> )                      | S9  |
| 8. <sup>1</sup> H NMR spectrum of methyl (1 <i>R</i> *,2 <i>S</i> *,4 <i>S</i> *)-2-(4-bromobenzoyl)-4-(4-bromophenyl)-4-hydroxy-6-oxocyclohexane-1-carboxylate ( <b>13</b> )  | S10 |
| 9. <sup>13</sup> C NMR spectrum of methyl (1 <i>R</i> *,2 <i>S</i> *,4 <i>S</i> *)-2-(4-bromobenzoyl)-4-(4-bromophenyl)-4-hydroxy-6-oxocyclohexane-1-carboxylate ( <b>13</b> ) | S11 |

10.  $^1\text{H}$  NMR spectrum of methyl (1*R*\*,2*S*\*,4*S*\*)-4-hydroxy-2-(4-methylbenzoyl)-4-(4-methylphenyl)-6-oxocyclohexane-1-carboxylate (**14**)  
S12
11.  $^{13}\text{C}$  NMR spectrum of methyl (1*R*\*,2*S*\*,4*S*\*)-4-hydroxy-2-(4-methylbenzoyl)-4-(4-methylphenyl)-6-oxocyclohexane-1-carboxylate (**14**)  
S13
12.  $^1\text{H}$  NMR spectrum of methyl (1*R*\*,2*S*\*,4*S*\*)-4-hydroxy-2-(4-methoxybenzoyl)-4-(4-methoxyphenyl)-6-oxocyclohexane-1-carboxylate (**15**)  
S14
13.  $^{13}\text{C}$  NMR spectrum of methyl (1*R*\*,2*S*\*,4*S*\*)-4-hydroxy-2-(4-methoxybenzoyl)-4-(4-methoxyphenyl)-6-oxocyclohexane-1-carboxylate (**15**)  
S15
14.  $^1\text{H}$  NMR spectrum of 7-Hydroxy-3,5-diphenyl-1,3-dihydro-1-isobenzofuranone (**18**)  
S16
15.  $^{13}\text{C}$  NMR spectrum of 7-Hydroxy-3,5-diphenyl-1,3-dihydro-1-isobenzofuranone (**18**)  
S17

## Experimental Section, General

The progress of all the reactions was monitored by TLC using a hexanes / ethyl acetate mixture as eluent. Column chromatography was accomplished on silica gel (100-200 mesh) using a hexanes / ethyl acetate mixture as eluent. The IR spectra were recorded as a solution in KBr or neat. The  $^1\text{H}$  NMR and  $^{13}\text{C}$  NMR spectra were recorded in  $\text{CDCl}_3$  or  $\text{CDCl}_3:\text{CCl}_4$  (1:1). The microwave reactions were carried out in a mono-made, multi power; (power source: 230 V, 50 Hz, microwave frequency: 2450 MHz) microwave oven. The *trans*-DBE and derivatives (**1**, **8-11**) were prepared according to the literature procedure.<sup>1</sup> Activated  $\text{Ba}(\text{OH})_2$  was prepared by heating commercial  $\text{Ba}(\text{OH})_2 \cdot 8\text{H}_2\text{O}$  at 200 °C for 3 h in a furnace and then stored in a desiccator.<sup>2</sup>

## References

1. Conant, J. B.; Lutz, R. E. *J. Am. Chem. Soc.*, **1923**, *45*, 1303. (b) Campaigne, E.; Foye, W. O. *J. Org. Chem.*, **1952**, *17*, 1405.
2. Garcia-Raso, A.; Garcia-Raso, J.; Campaner, B.; Mestres, R.; Sinistera, J. V. *Synthesis*, **1982**, 1037.

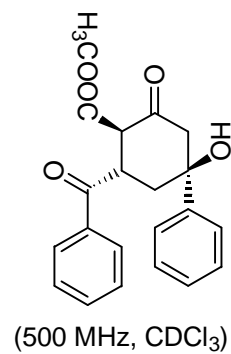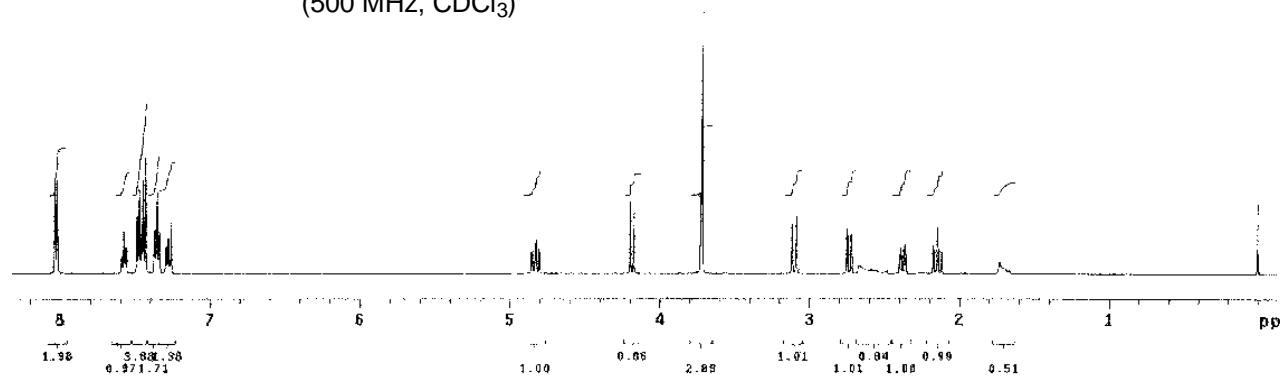

500 MHz (CDCl<sub>3</sub>) <sup>1</sup>H NMR spectrum of methyl (1*R*\*,2*S*\*,4*S*\*)- 2-benzoyl-4-hydroxy-6-oxo-4-phenylcyclohexane-1-carboxylate (**5**)

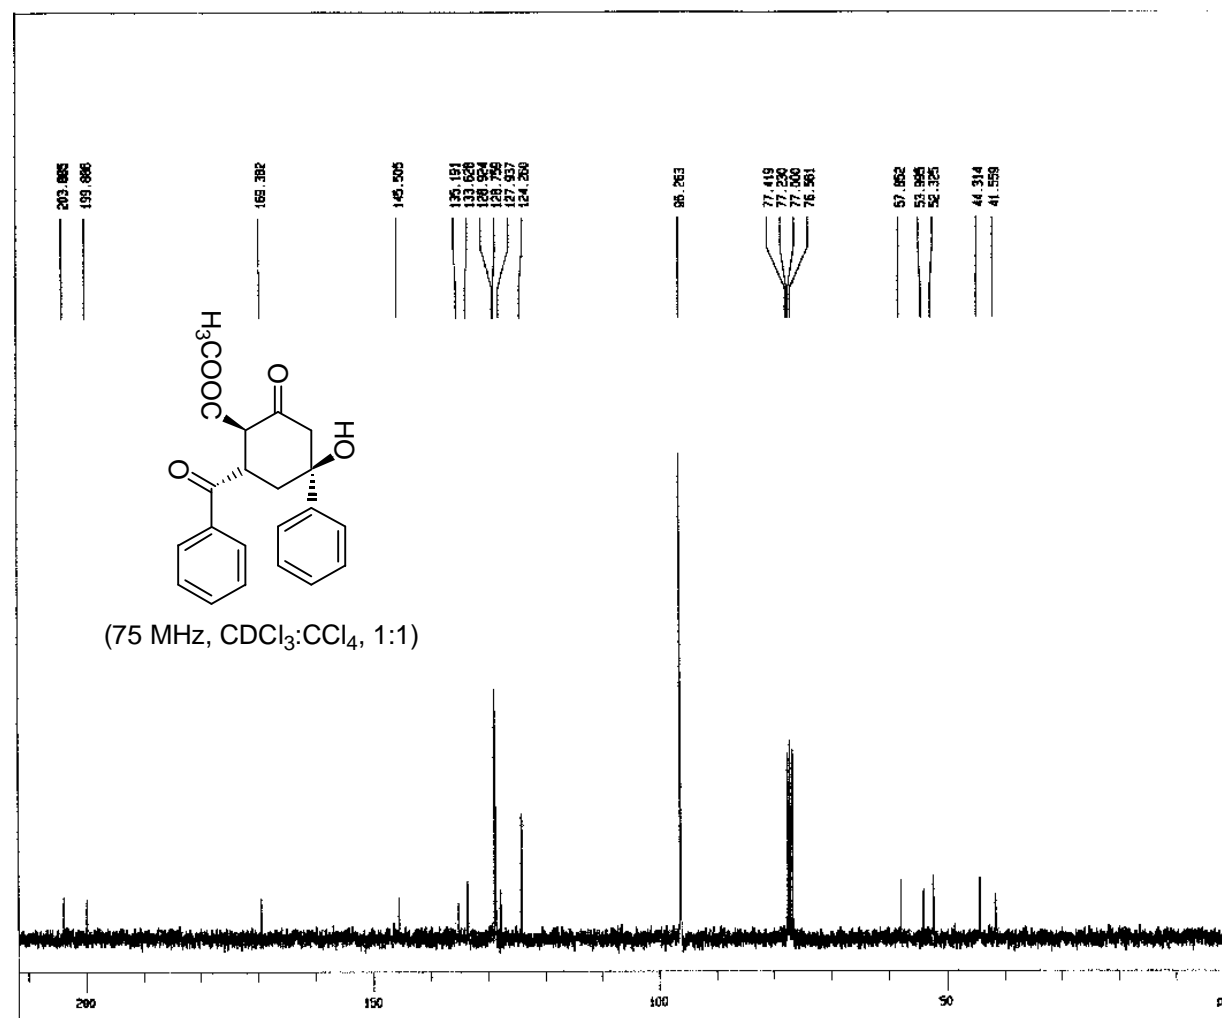

75 MHz (CDCl<sub>3</sub>/CCl<sub>4</sub>, 1:1) <sup>13</sup>C NMR spectrum of methyl (1*R*\*,2*S*\*,4*S*\*)- 2-benzoyl-4-hydroxy-6-oxo-4-phenylcyclohexane-1-carboxylate (**5**)

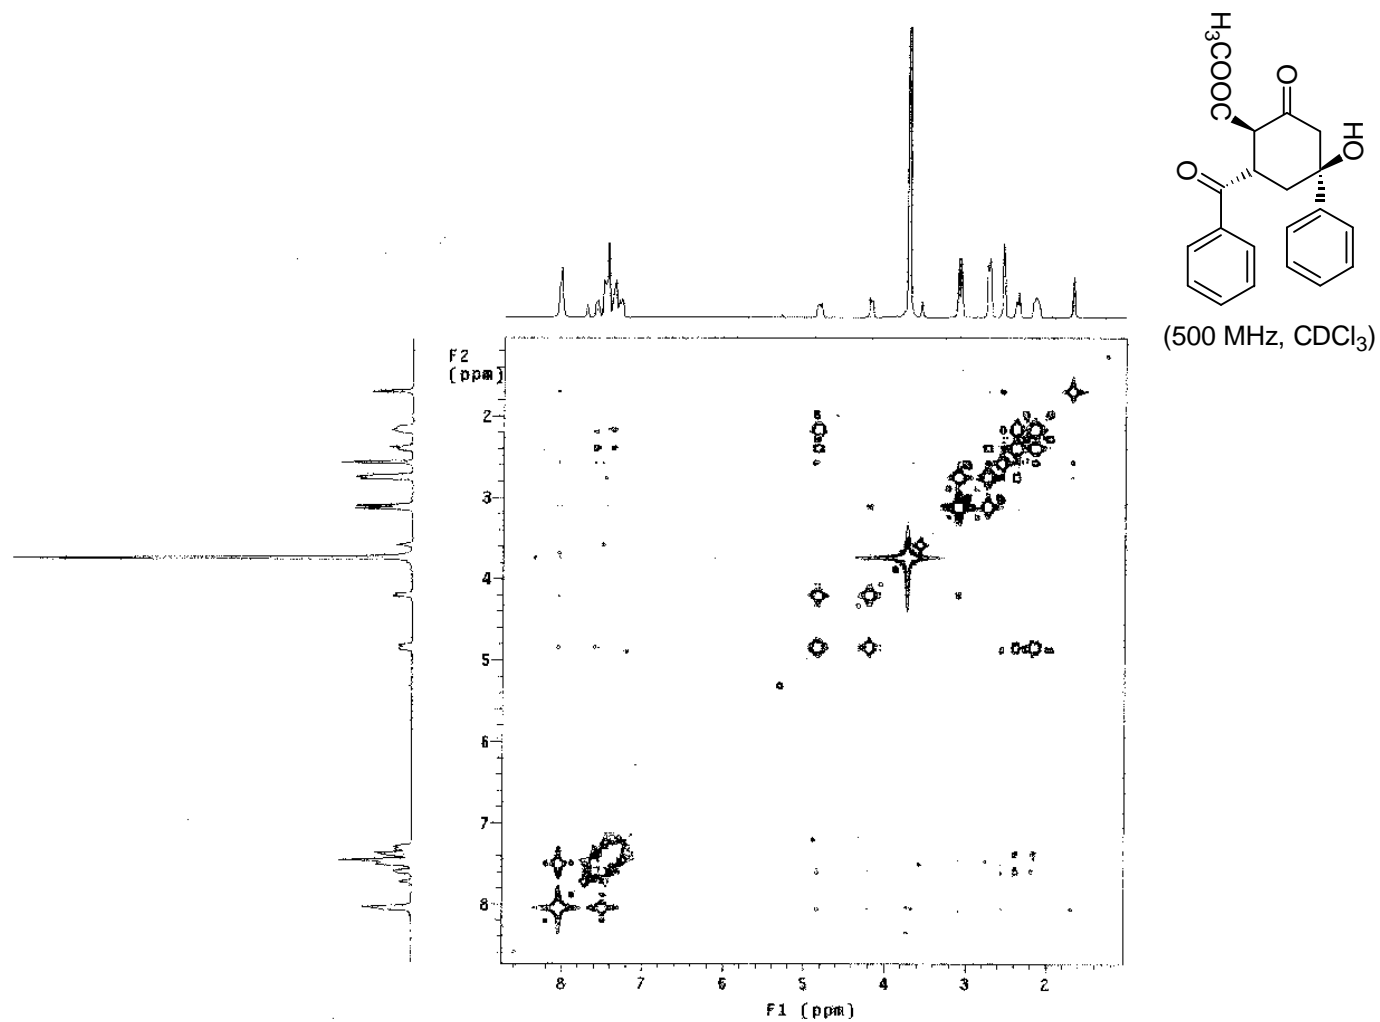

500 MHz ( $\text{CDCl}_3$ )  $^1\text{H}$ - $^1\text{H}$  COSY spectrum of methyl (1*R*\*,2*S*\*,4*S*\*)- 2-benzoyl-4-hydroxy-6-oxo-4-phenylcyclohexane-1-carboxylate (**5**)

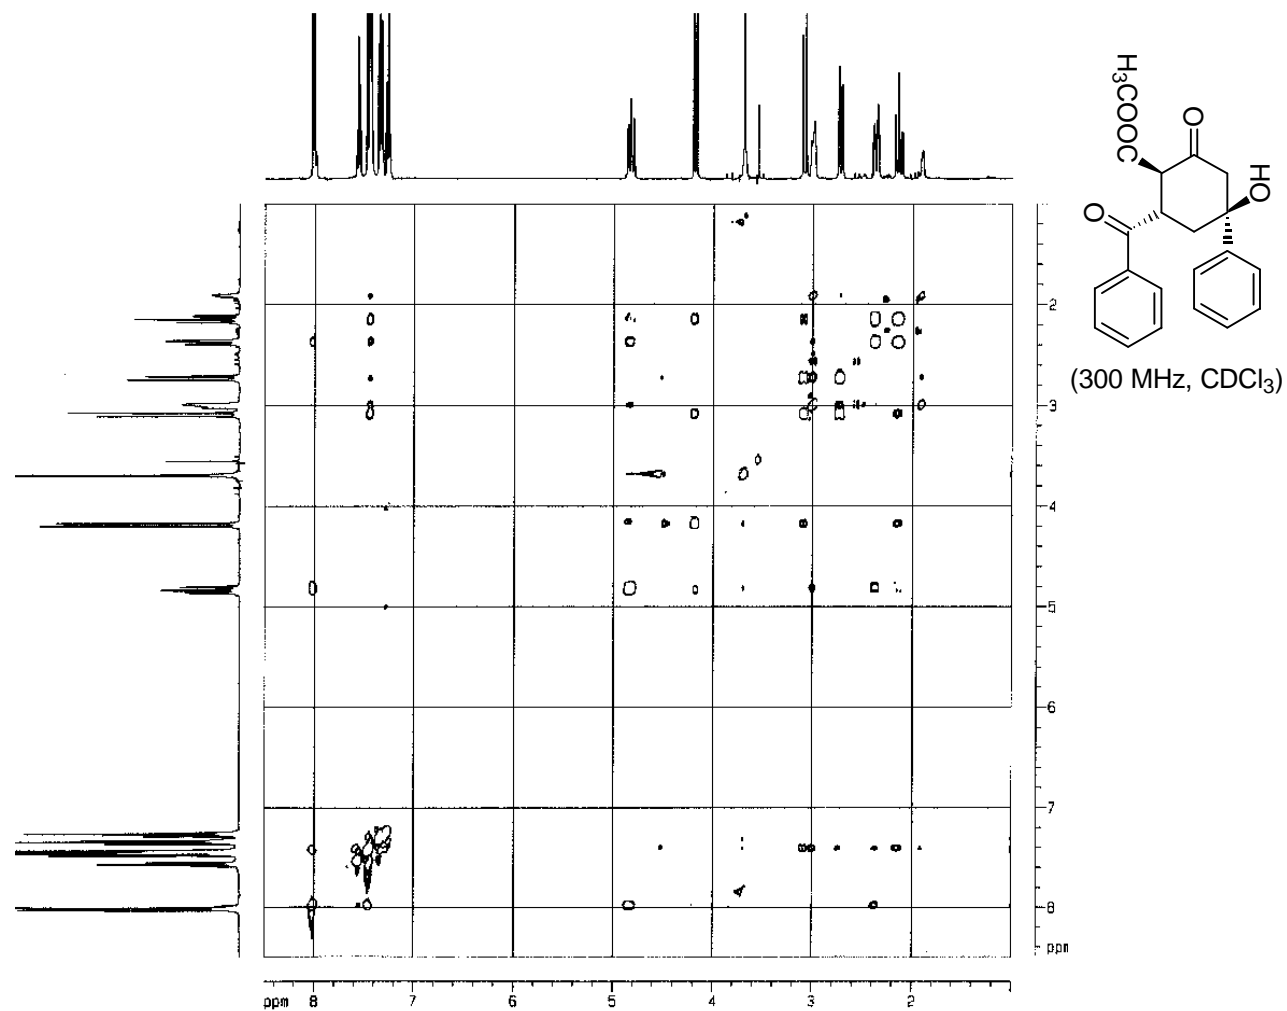

300 MHz (CDCl<sub>3</sub>) NOESY spectrum of methyl (1*R*\*,2*S*\*,4*S*\*)-2-benzoyl-4-hydroxy-6-oxo-4-phenylcyclohexane-1-carboxylate (**5**)

400 MHz (CDCl<sub>3</sub>) <sup>1</sup>H NMR spectrum of diastereomeric mixture of methyl 2-(4-chloro-3-methylbenzoyl)-4-(4-chloro-3-methylphenyl)-4-hydroxy-6-oxocyclohexane-1-carboxylate (**12**)



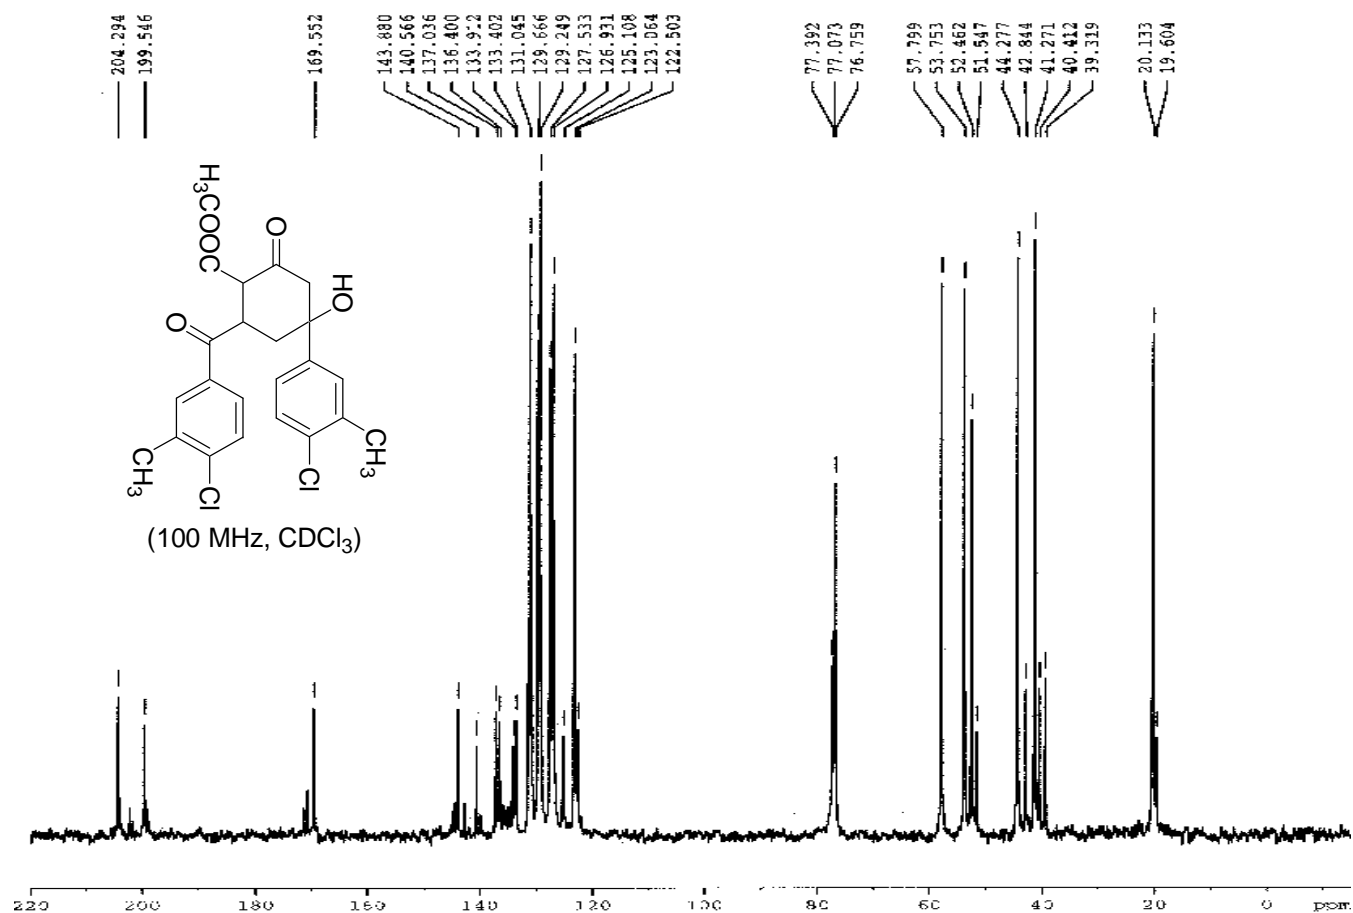

100 MHz (CDCl<sub>3</sub>) <sup>13</sup>C NMR spectrum of diastereomeric mixture of methyl 2-(4-chloro-3-methylbenzoyl)-4-(4-chloro-3-methylphenyl)-4-hydroxy-6-oxocyclohexane-1-carboxylate (**12**)

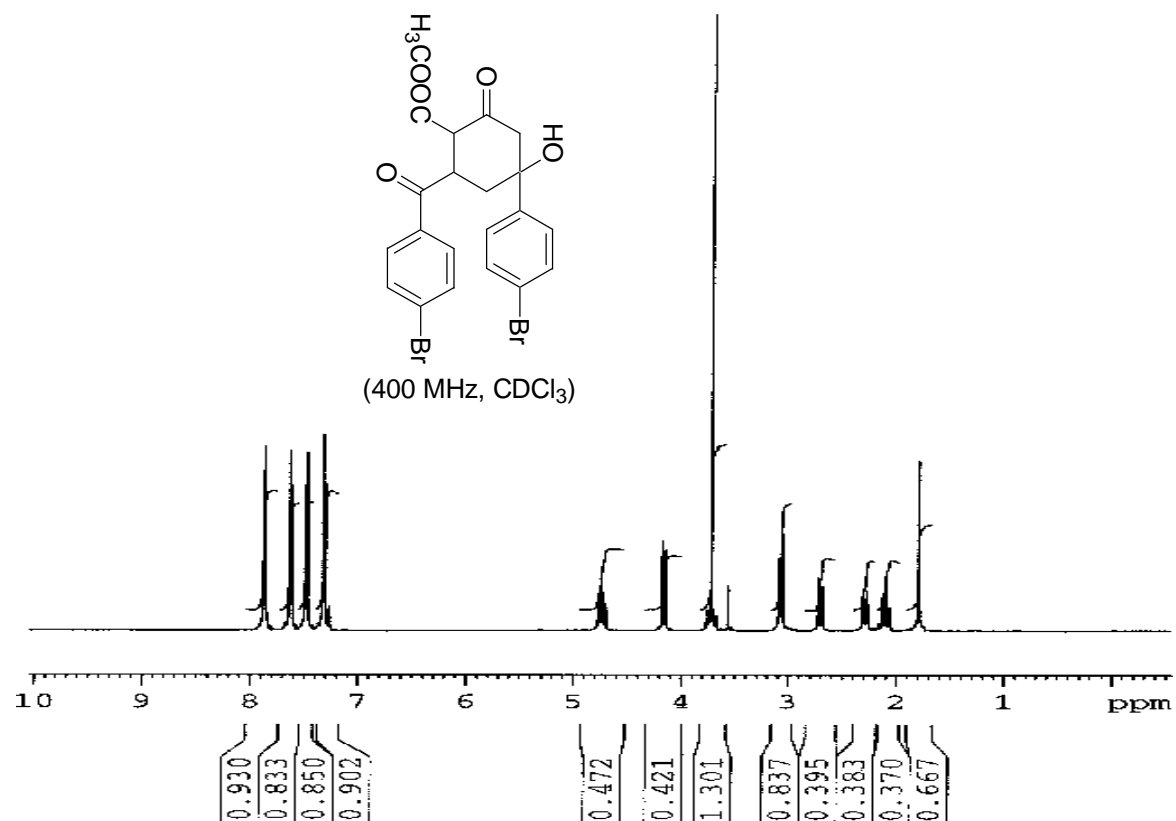

400 MHz (CDCl<sub>3</sub>) <sup>1</sup>H NMR spectrum of methyl (1*R*\*2*S*\*,4*S*\*)-2-(4-bromobenzoyl)-4-(4-bromophenyl)-4-hydroxy-6-oxocyclohexane-1-carboxylate (**13**)

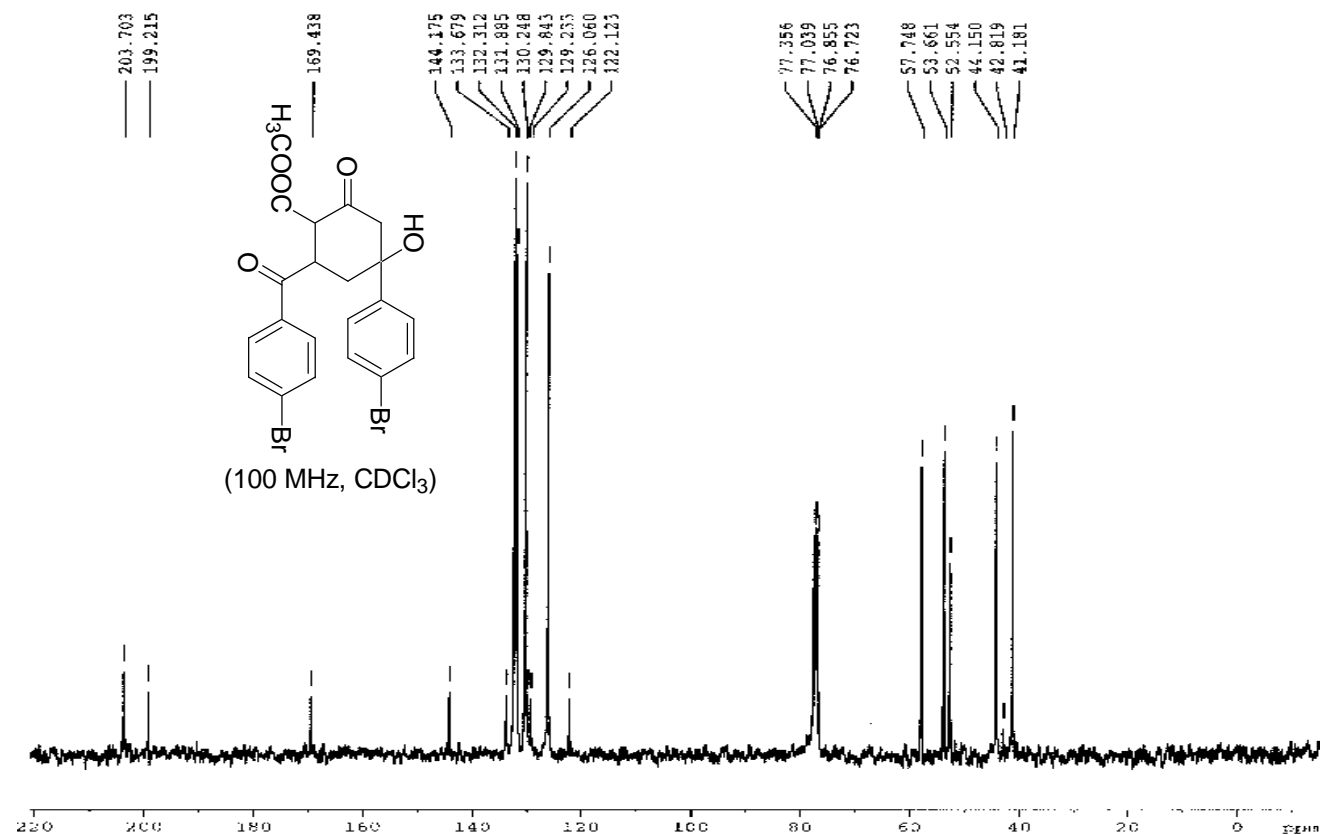

100 MHz (CDCl<sub>3</sub>) <sup>13</sup>C NMR spectrum of methyl (1*R*\*,2*S*\*,4*S*\*)-2-(4-bromobenzoyl)-4-(4-bromophenyl)-4-hydroxy-6-oxocyclohexane-1-carboxylate (**13**)

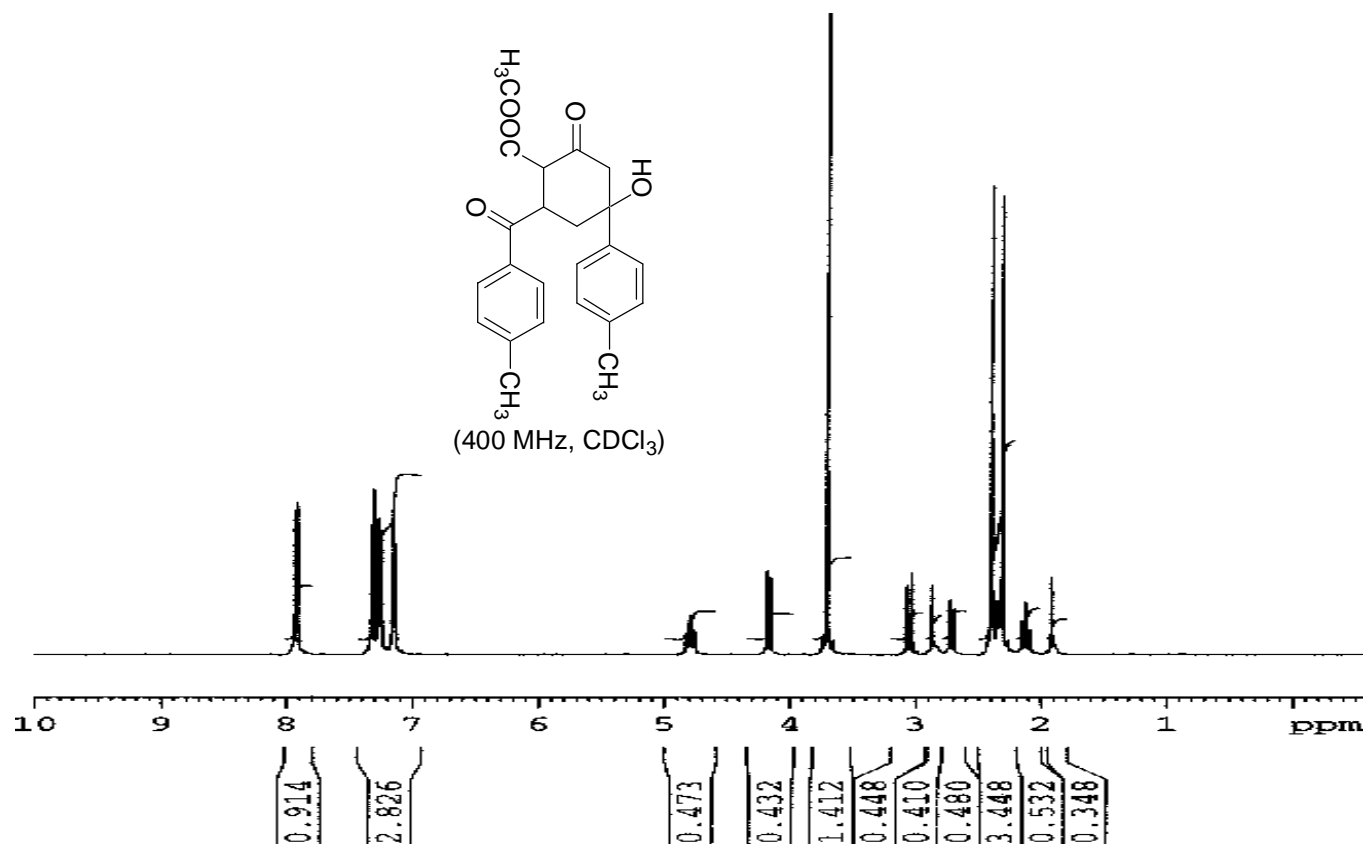

400 MHz (CDCl<sub>3</sub>) <sup>1</sup>H NMR spectrum of methyl (1*R*\*,2*S*\*,4*S*\*)-4-hydroxy-2-(4-methylbenzoyl)-4-(4-methylphenyl)-6-oxocyclohexane-1-carboxylate (**14**)

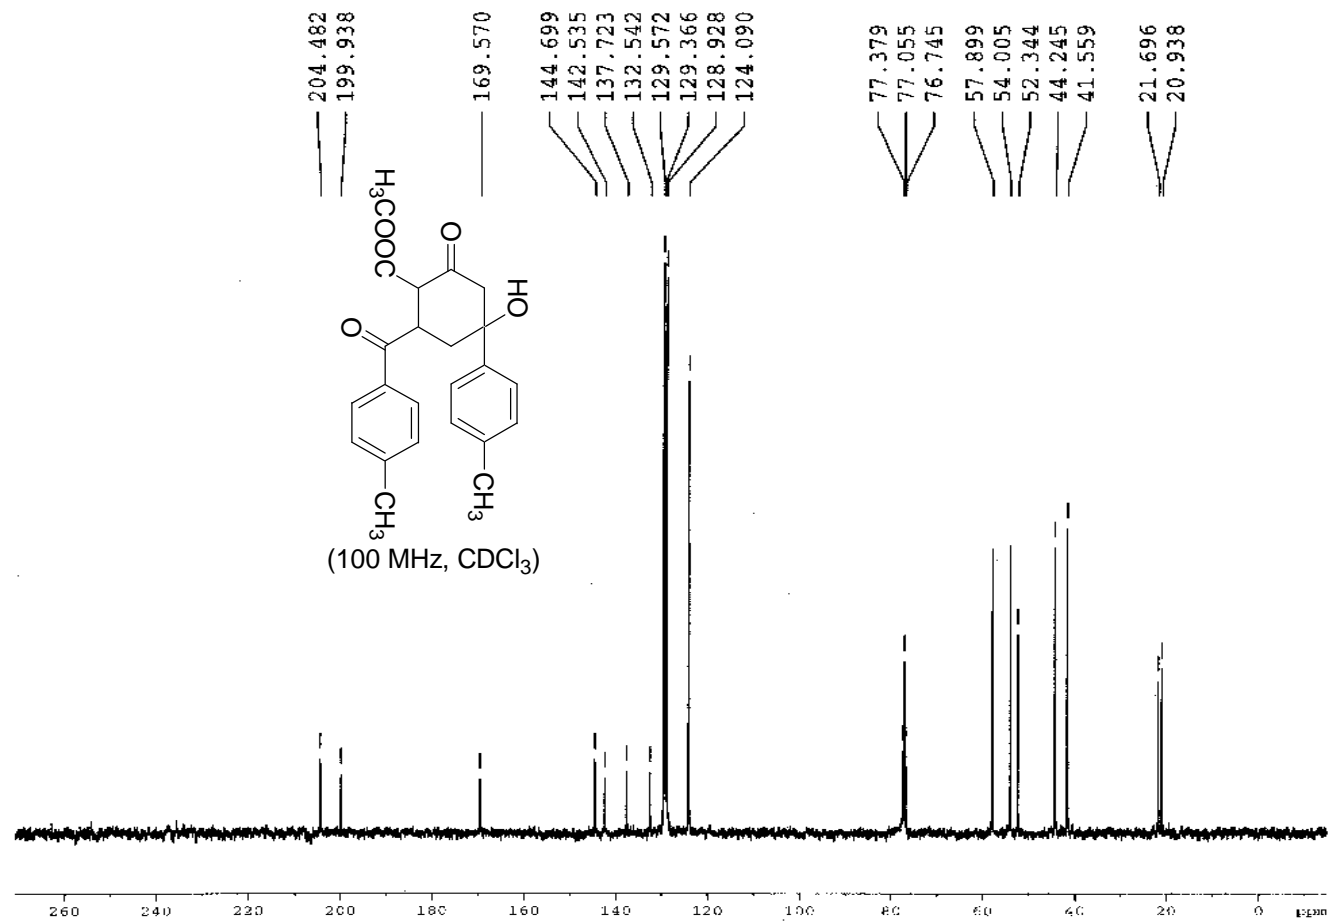

100 MHz (CDCl<sub>3</sub>) <sup>13</sup>C NMR spectrum of methyl (1*R*\*,2*S*\*,4*S*\*)-4-hydroxy-2-(4-methylbenzoyl)-4-(4-methylphenyl)-6-oxocyclohexane-1-carboxylate (**14**)

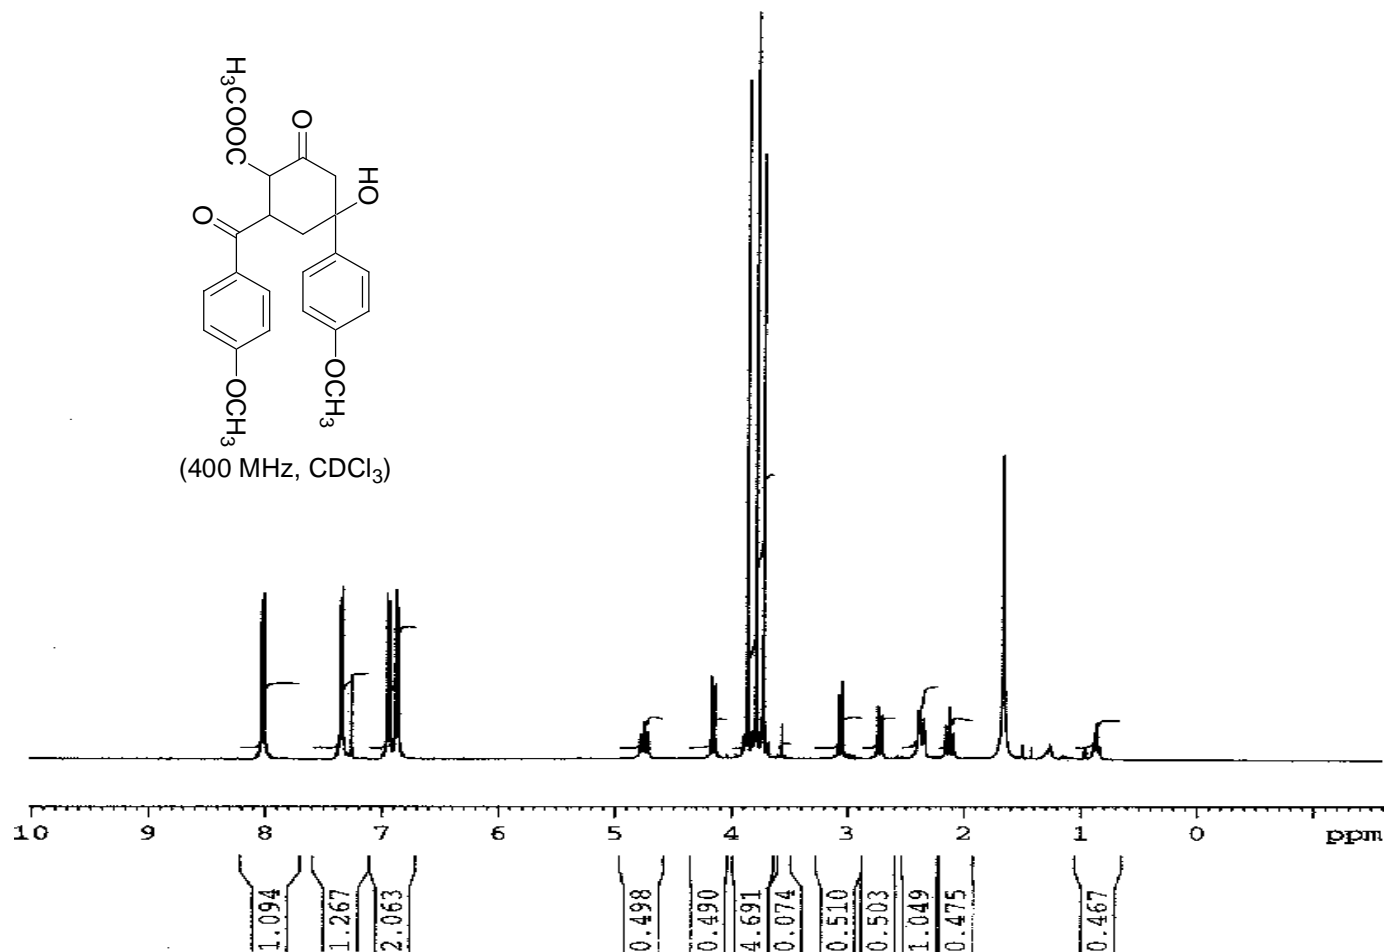

400 MHz (CDCl<sub>3</sub>) <sup>1</sup>H NMR spectrum of methyl (1*R*\*,2*S*\*,4*S*\*)-4-hydroxy-2-(4-methoxybenzoyl)-4-(4-methoxyphenyl)-6-oxocyclohexane-1-carboxylate (**15**)

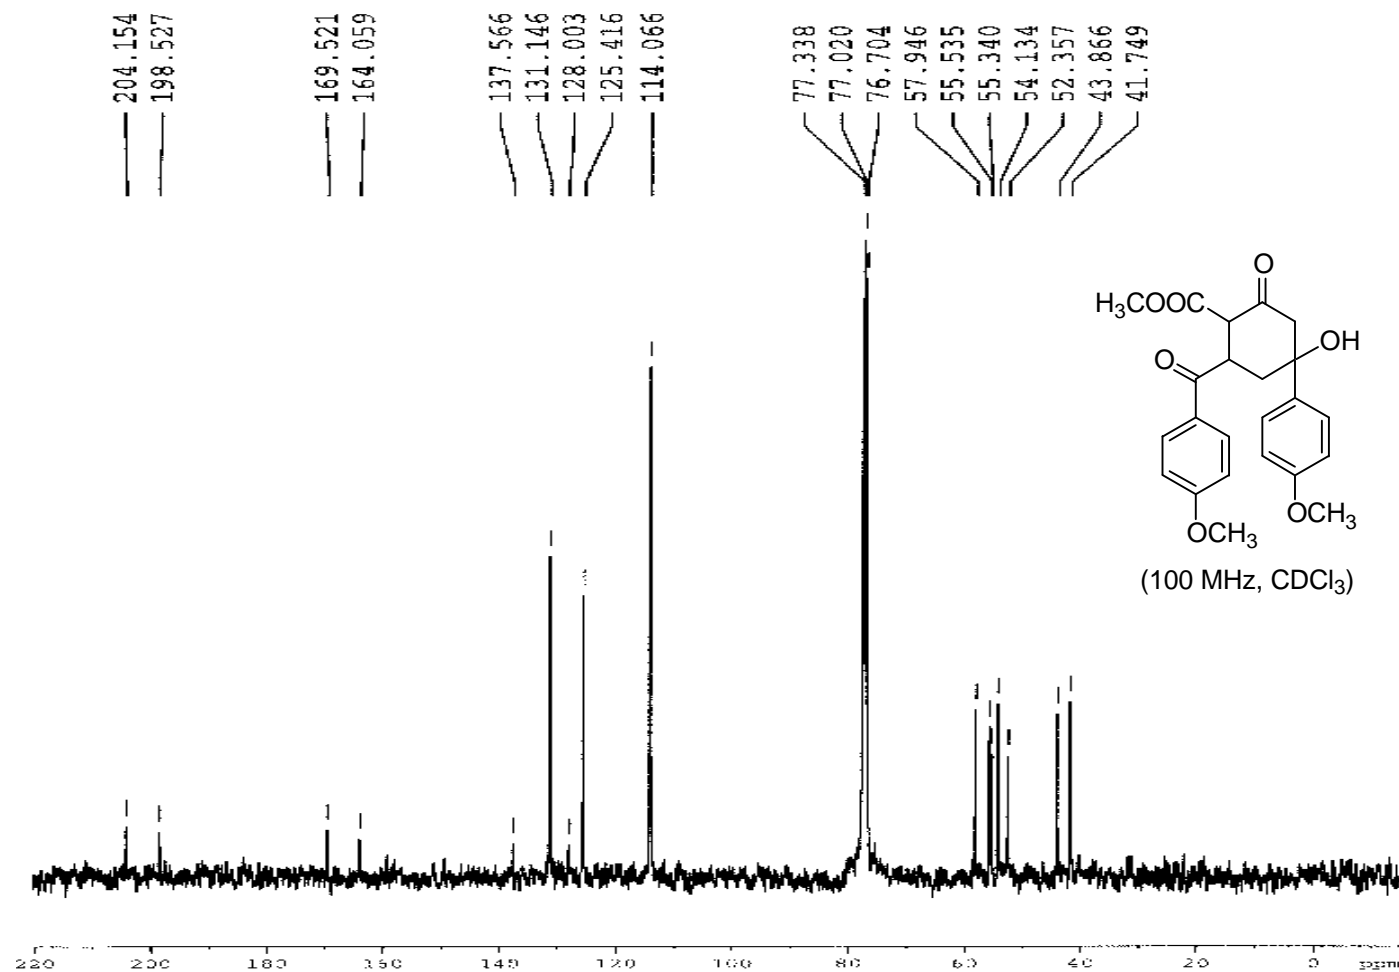

100 MHz (CDCl<sub>3</sub>) <sup>13</sup>C NMR spectrum of methyl (1*R*\*,2*S*\*,4*S*\*)-4-hydroxy-2-(4-methoxybenzoyl)-4-(4-methoxyphenyl)-6-oxocyclohexane-1-carboxylate (**15**)

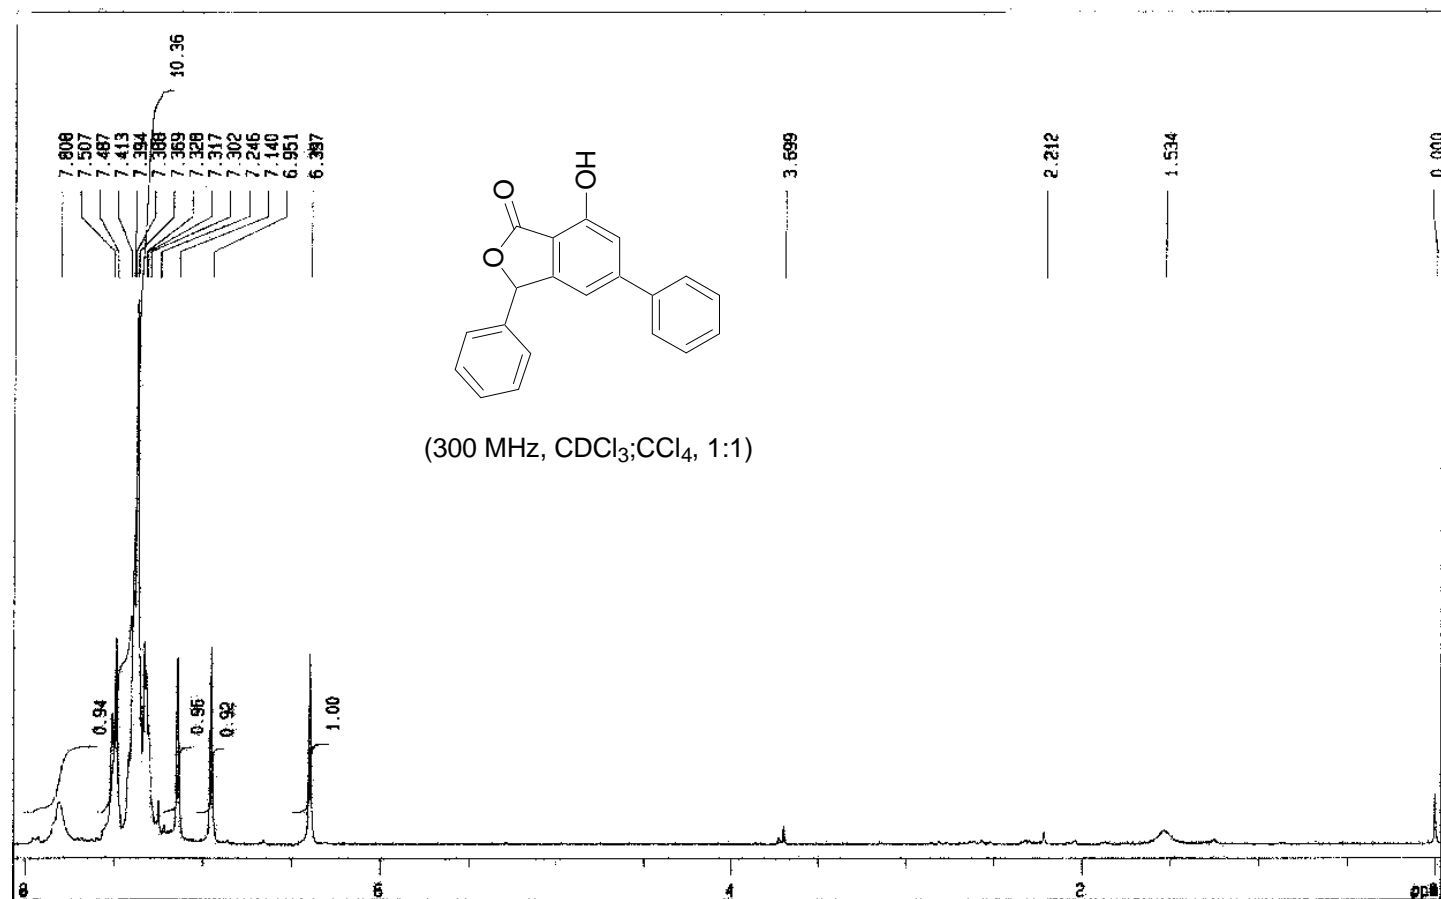

300 MHz (CDCl<sub>3</sub>:CCl<sub>4</sub>, 1:1) <sup>1</sup>H NMR spectrum of 7-hydroxy-3,5-diphenyl-1,3-dihydro-1-isobenzofuranone (18)



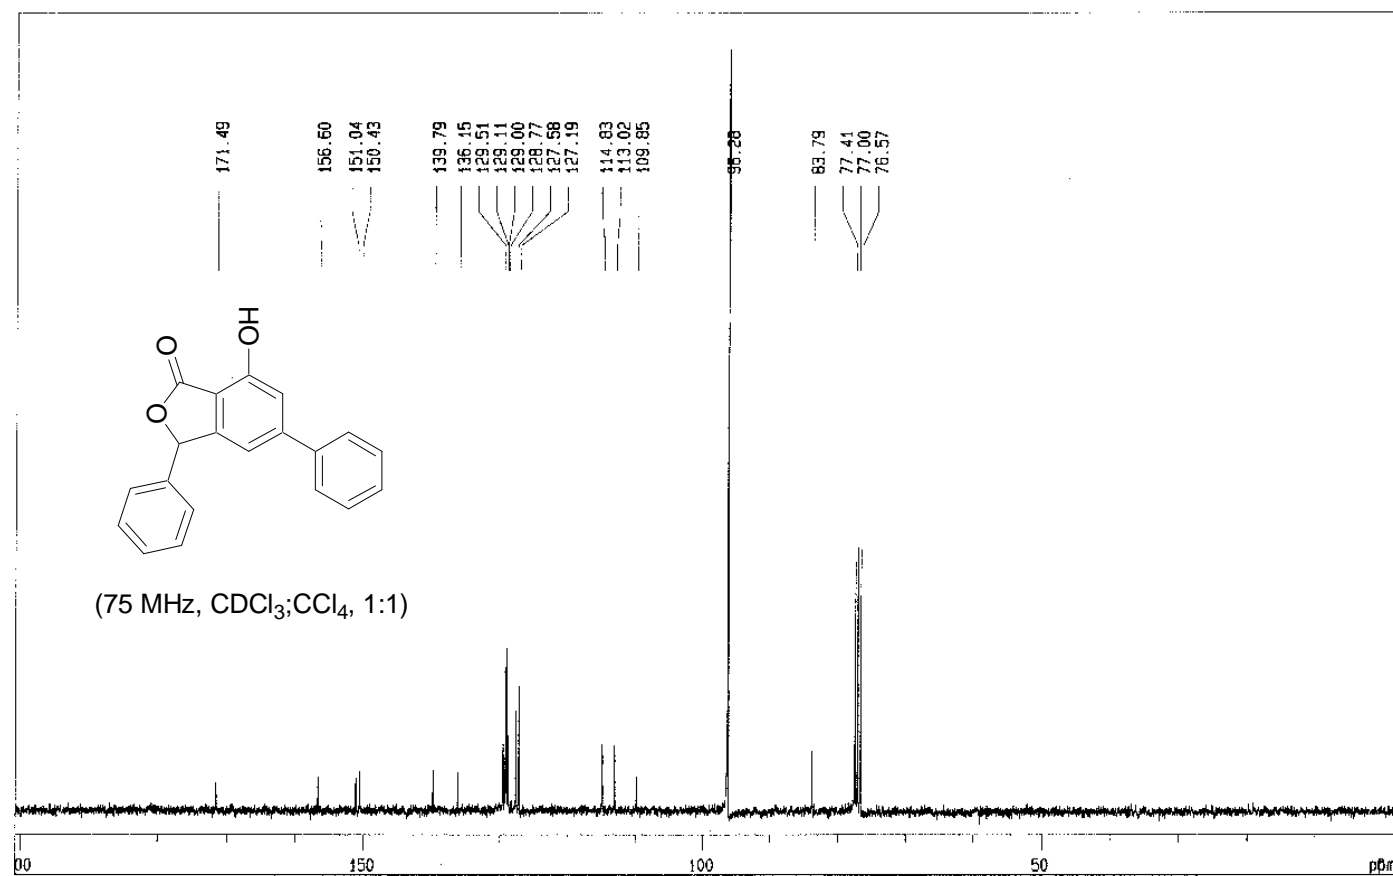

75 MHz (CDCl<sub>3</sub>:CCl<sub>4</sub>, 1:1) <sup>13</sup>C NMR spectrum of 7-hydroxy-3,5-diphenyl-1,3-dihydro-1-isobenzofuranone (**18**)
